# Supplementary material for: In vivo and in vitro evaluation of dihydroartemisinin prodrug nanocomplexes as a nano-drug delivery system: characterization, pharmacokinetics and pharmacodynamics
Source: Royal Society of Chemistry journal article supplement (doi:10.1039/d0ra02150d), 2020-01-01
Supplement: d0ra02150d1.pdf [file d0ra02150d1.pdf]

## Supporting information for:

### ***In vivo* and *in vitro* evaluation of dihydroartemisinin prodrug nanocomplexes as a nano-drug delivery system: characterization, pharmacokinetics and pharmacodynamics**

Guolian Ren<sup>1</sup>, Pei Chen<sup>1,2</sup>, Jiaqi Tang<sup>1</sup>, Wenju Guo<sup>1</sup>, Rongrong Wang<sup>1</sup>, Ning Li<sup>1</sup>, Yujie Li<sup>1</sup>, Guoshun Zhang<sup>1</sup>, Ruili Wang<sup>1</sup> and Shuqiu Zhang<sup>1,\*</sup>

<sup>1</sup>*School of pharmacy, Shanxi Medical University, Taiyuan, Shanxi, China*

<sup>2</sup>*School of pharmacy, the Second Military Medical University, Shanghai, China*

Corresponding author: Shuqiu Zhang

shuqiu.zhang@126.com

School of pharmacy, Shanxi Medical University, Taiyuan, Shanxi, 030001, China

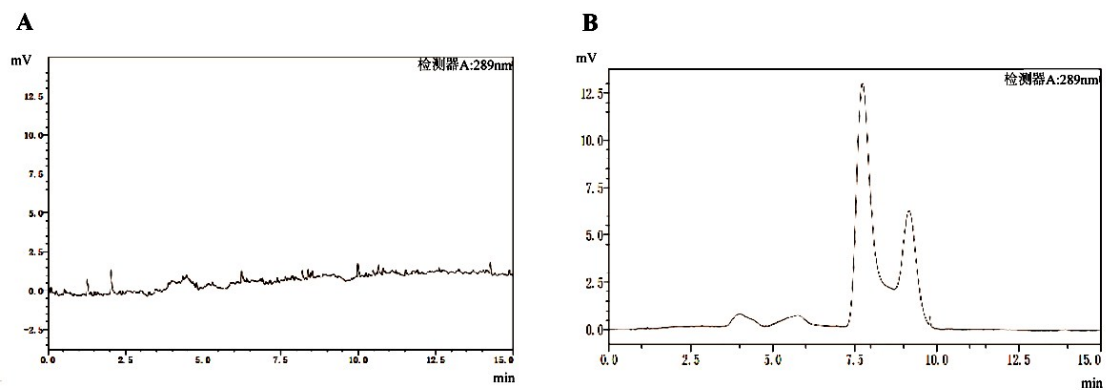

**Fig. S1** The HPLC chromatogram of blank (A) and DHA-C<sub>12</sub> (B)

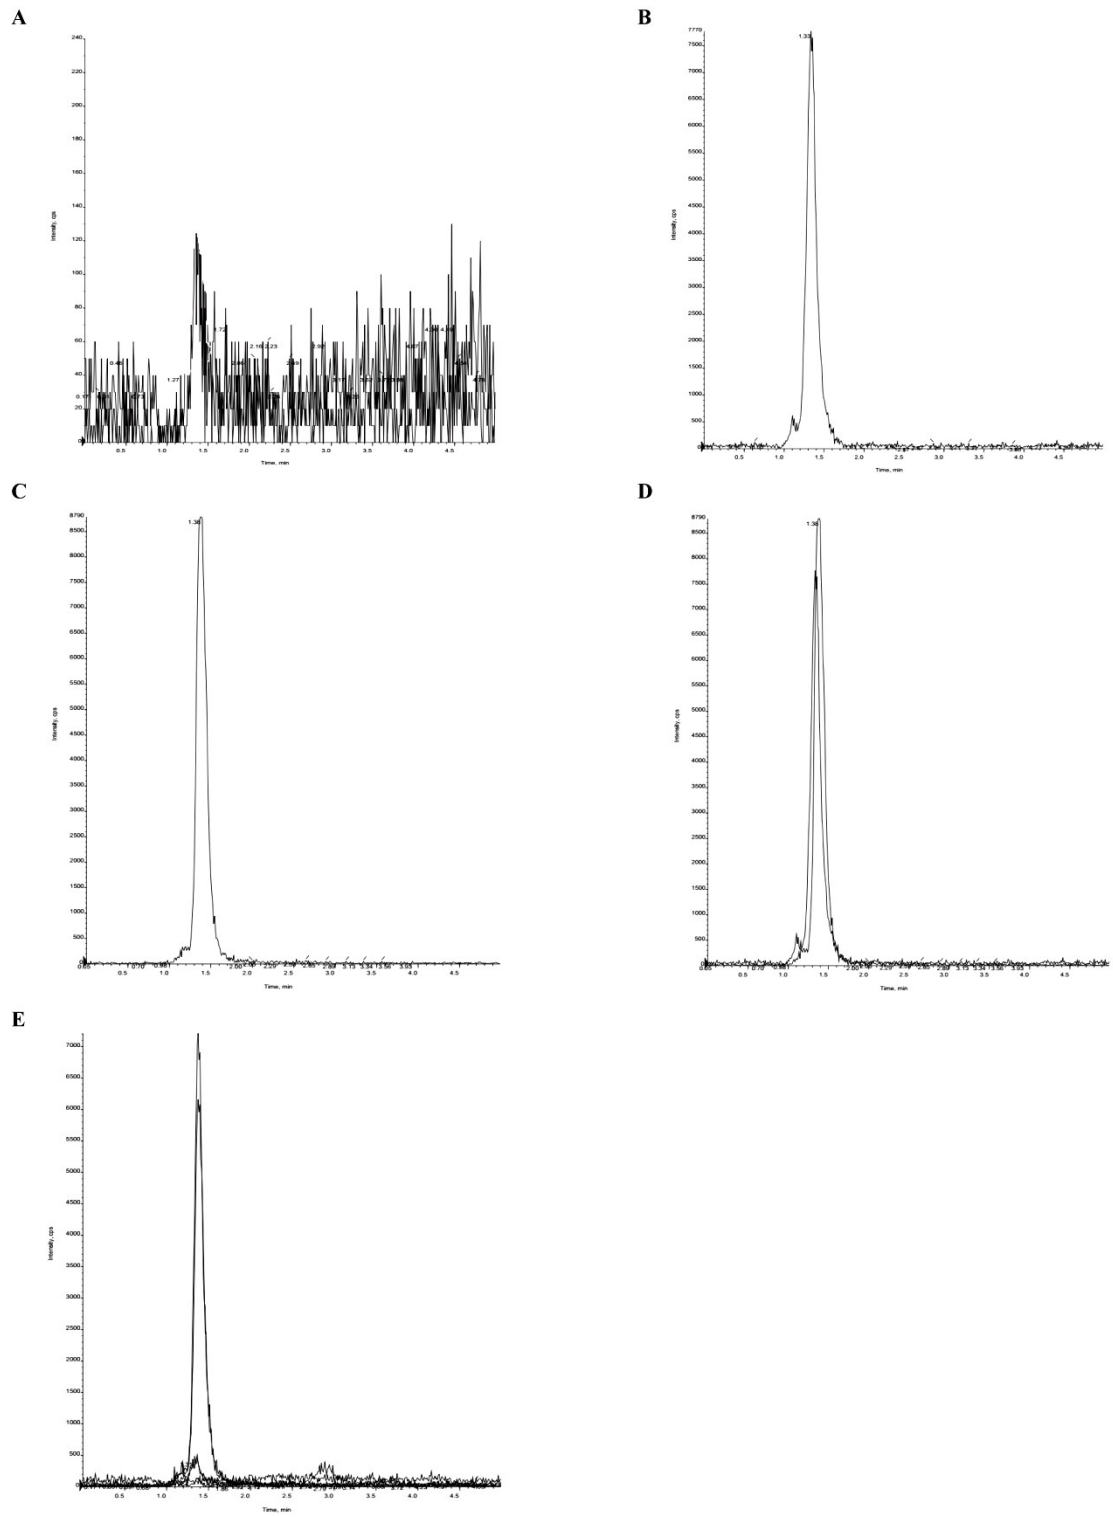

**Fig. S2** The HPLC-MS/MS chromatogram of blank rat plasma (A), blank rat plasma with DHA (B), blank rat plasma with ART (C), blank rat plasma with DHA and ART (D), and rat plasma after intravenously administered DHA-Sol for 0.5 h.

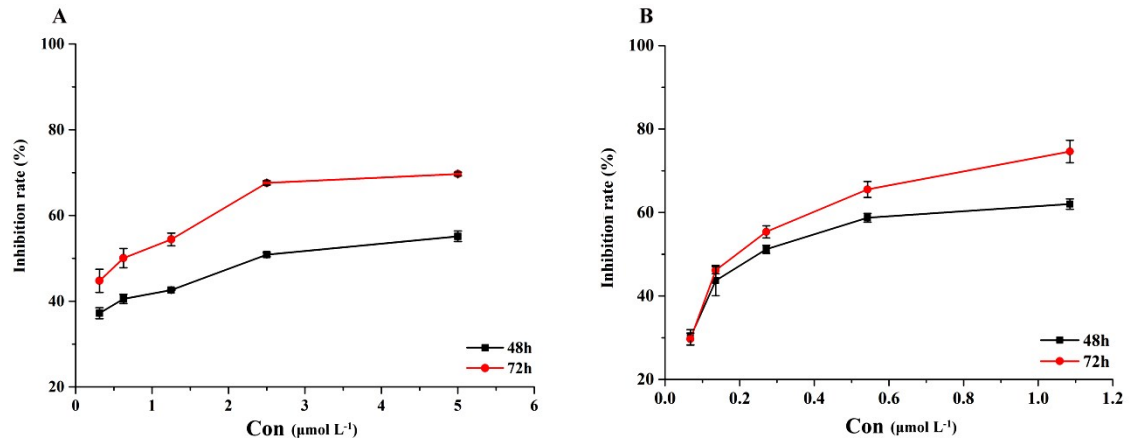

**Fig. S3** The inhibition rate of 4T1 cells after treatment with different concentrations of DHA-Sol (A) and DHANPs (B) for 48 h and 72 h

**Table S1** The intra- and inter-day precision of HPLC-post-column derivative analysis of DHA

| C ( $\mu\text{g mL}^{-1}$ ) | Intra-day precision (%) | Inter-day precision (%) |
|-----------------------------|-------------------------|-------------------------|
| 2.5                         | 0.5                     | 1.4                     |
| 10                          | 0.3                     | 0.5                     |
| 48                          | 0.2                     | 0.2                     |

| C ( $\mu\text{g mL}^{-1}$ ) | Recovery (%) |       |       | Mean (%) | RSD (%) |
|-----------------------------|--------------|-------|-------|----------|---------|
|                             | 1            | 2     | 3     |          |         |
| 2.5                         | 105.6        | 108.8 | 108.1 | 107.5    | 1.7     |
| 10                          | 95.4         | 96.4  | 94.3  | 95.4     | 1.1     |
| 48                          | 85.9         | 86.6  | 86.1  | 86.2     | 0.5     |

**Table S2** The recovery of HPLC-post-column derivative analysis of DHA

**Table S3** Accuracy and precision for DHA in rat plasma at LLQQ (n = 6)

| Analyte | Added Con (ng mL <sup>-1</sup> ) | Found Con (ng mL <sup>-1</sup> ) | SD  | RSD (%) | RE (%) |
|---------|----------------------------------|----------------------------------|-----|---------|--------|
| DHA     | 5.0                              | 4.9                              | 0.6 | 12.2    | 7.0    |

**Table S4** Accuracy and precision for the determination of DHA in rat plasma (n =6)

| Added (ng mL <sup>-1</sup> ) | Intra-day                    |         |        | Inter-day                    |         |        |
|------------------------------|------------------------------|---------|--------|------------------------------|---------|--------|
|                              | Found (ng mL <sup>-1</sup> ) | RSD (%) | RE (%) | Found (ng mL <sup>-1</sup> ) | RSD (%) | RE (%) |
| 10.0                         | 11.3 ± 1.2                   | 10.6    | 13.0   | 11.4 ± 0.6                   | 5.3     | 14.0   |
| 500.0                        | 506.0 ± 30.1                 | 5.9     | 1.2    | 510.0 ± 22.3                 | 4.4     | 2.0    |
| 8000.0                       | 7903.0 ± 243.6               | 3.1     | -1.2   | 8064.4 ± 223.4               | 2.8     | 0.8    |



**Table S5** *In vivo* pharmacokinetic parameters of DHA and DHANPs in rats after i.v administration of DHA-Sol at the dose of 0.02 mmol DHA kg<sup>-1</sup> (n = 6).

| Parameters        | AUC <sub>(0-t)</sub> ((mmol L <sup>-1</sup> )·h) | AUC <sub>(0-∞)</sub> ((mmol L <sup>-1</sup> )·h) | t <sub>1/2</sub> (h) | CLz (L h <sup>-1</sup> ) | Vz (L)    |
|-------------------|--------------------------------------------------|--------------------------------------------------|----------------------|--------------------------|-----------|
| DHA <sup>25</sup> | 3.86 ± 0.62                                      | 4.15 ± 0.73                                      | 0.3 ± 0.1            | 6.1 ± 1.2                | 2.6 ± 0.3 |
| DHANPs            | 62.24 ± 21.35                                    | 64.19 ± 22.22                                    | 3.8 ± 3.6            | 0.4 ± 0.1                | 2.0 ± 2.0 |

**Table S6** IC<sub>50</sub> of DHA-Sol and DHANPs in 4T1 cells after 48 h and 72 h incubation.

| Preparations | 48 h ( $\mu\text{mol L}^{-1}$ ) | 72 h ( $\mu\text{mol L}^{-1}$ ) |
|--------------|---------------------------------|---------------------------------|
| DHA-Sol      | $2.31 \pm 0.10$                 | $0.62 \pm 0.02$                 |
| DHANPs       | $2.47 \pm 0.15$                 | $1.79 \pm 0.13$                 |
